# Supplementary material for: Computational identification of natural product inhibitors against EGFR double mutant (T790M/L858R) by integrating ADMET, machine learning, molecular docking and a dynamics approach
Source: Royal Society of Chemistry journal article supplement (doi:10.1039/d2ra00373b), 2022-01-01

**Supplementary Fig. S1:** Shows 3D protein-ligand intermolecular interactions involving key residues with (A) 5N3 (B) Zn03 (C) Zn05 (D) Zn35 and (E) Zn05-NH2. The figures have been generated using PyMol

(A)

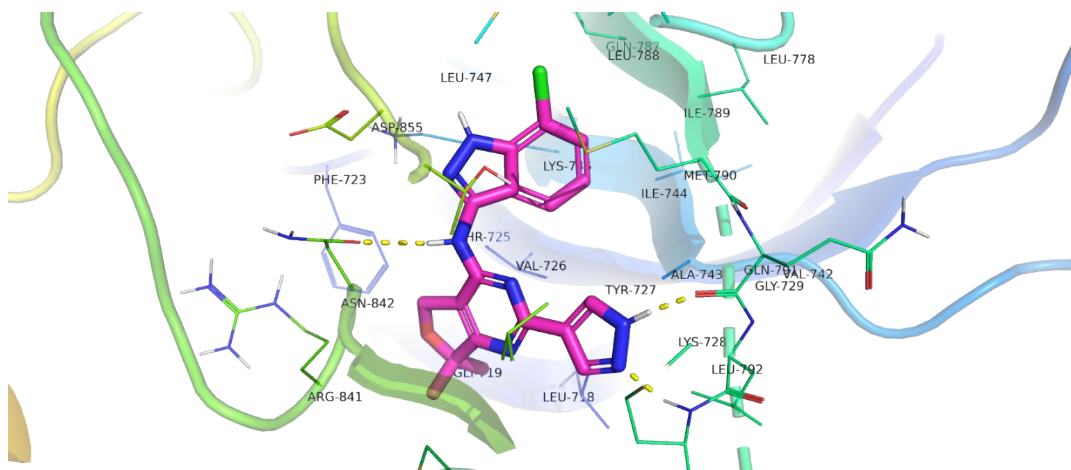

(B)

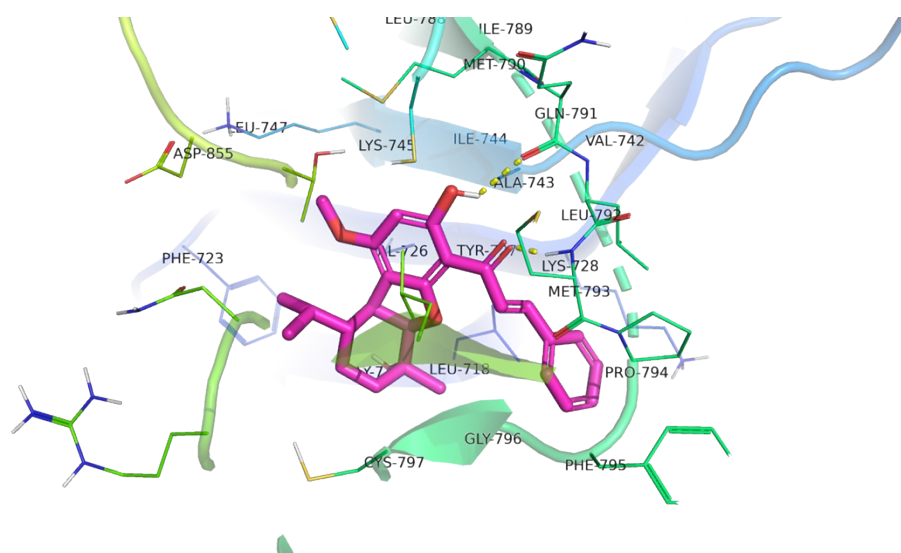

(C)

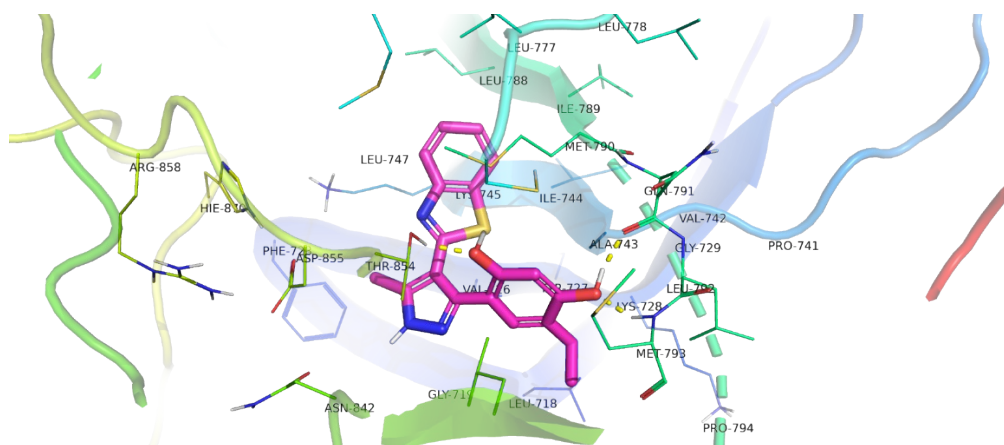

**(D)**

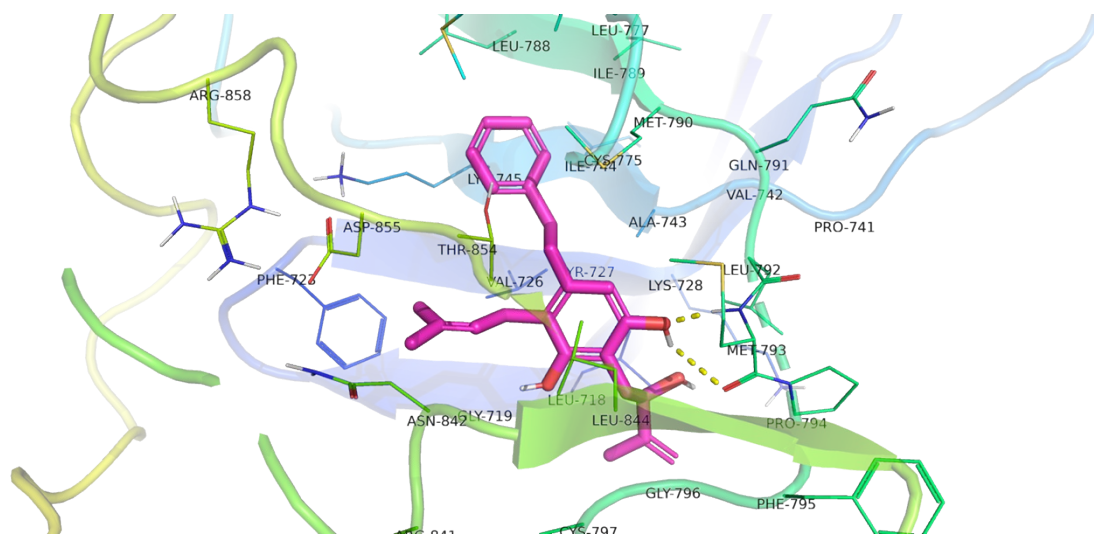

**(E)**

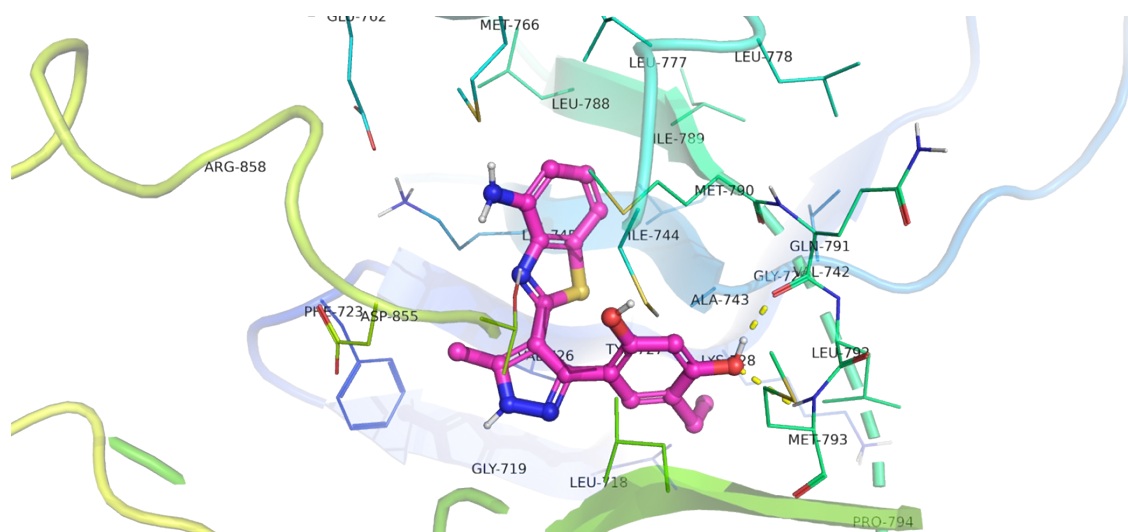

Supplement: d2ra00373b1.pdf [file d2ra00373b1.pdf]
